# Supplementary material for: Exploring the temporal dynamics of speech production with EEG and group ICA
Source: PubMed Central journal article supplement (PMC7048769; doi:10.1038/s41598-020-60301-1), 2020-02-28
Supplement: 41598_2020_60301_MOESM1_ESM.pdf [file 41598_2020_60301_MOESM1_ESM.pdf]

Supplementary Materials for: Exploring the  
temporal dynamics of speech production with  
EEG and group ICA

Niels Janssen<sup>1,2,3</sup>, Maartje van der Meij<sup>1</sup>, Pedro Javier López-Pérez<sup>4</sup>  
and Horacio A. Barber-Friend<sup>1,2,3,5</sup>

<sup>1</sup>Departamento de Psicología, Universidad de la Laguna, Spain

<sup>2</sup>Instituto de Tecnologías Biomedicas, Universidad de la Laguna,  
Spain

<sup>3</sup>Instituto de Neurociencias, Universidad de la Laguna, Spain

<sup>4</sup>Departamento de Psicología Evolutiva y de la Educación,  
Universidad de Málaga, Spain

<sup>5</sup>Basque Center on Cognition, Brain and Language (BCBL), Spain

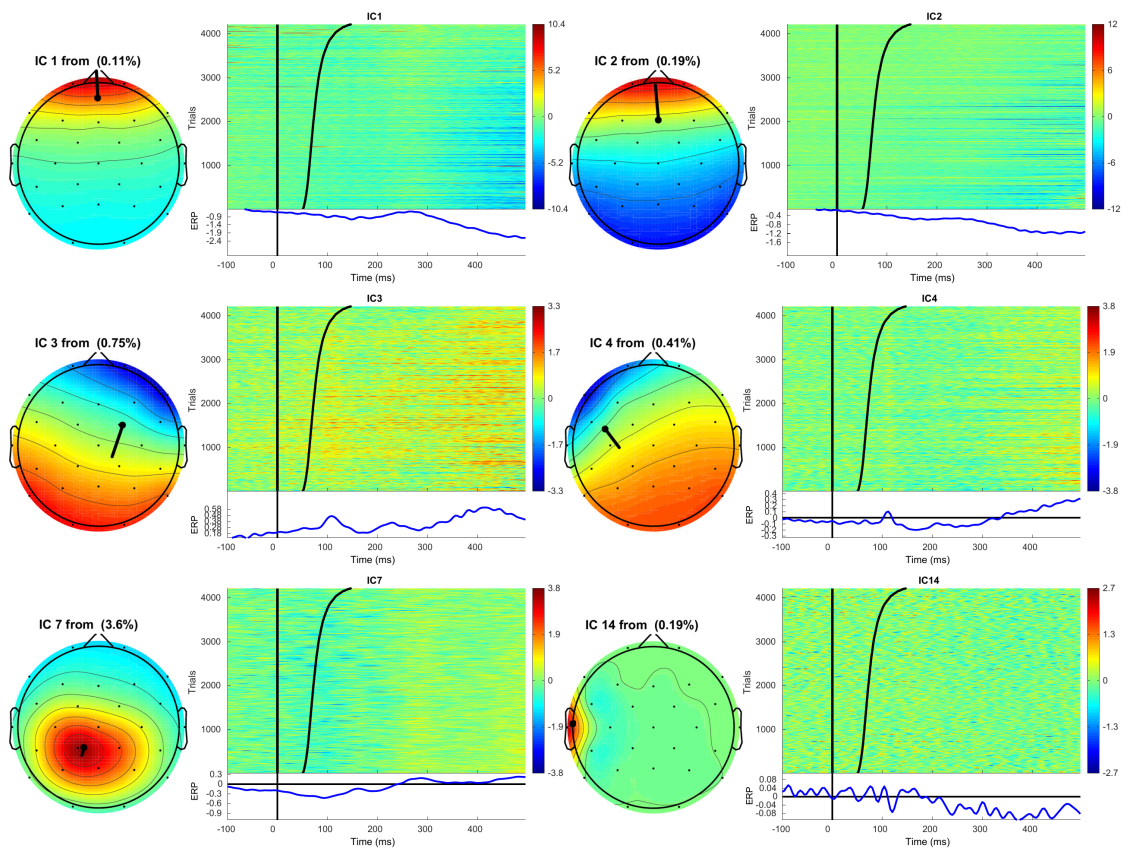

Figure S1: List of excluded components in range IC1-14. Note these components represent various noise components like eye blinks (e.g., ICs 1, 2), horizontal eye movements (e.g., ICs 3 and 4), and muscle artefacts (IC14).

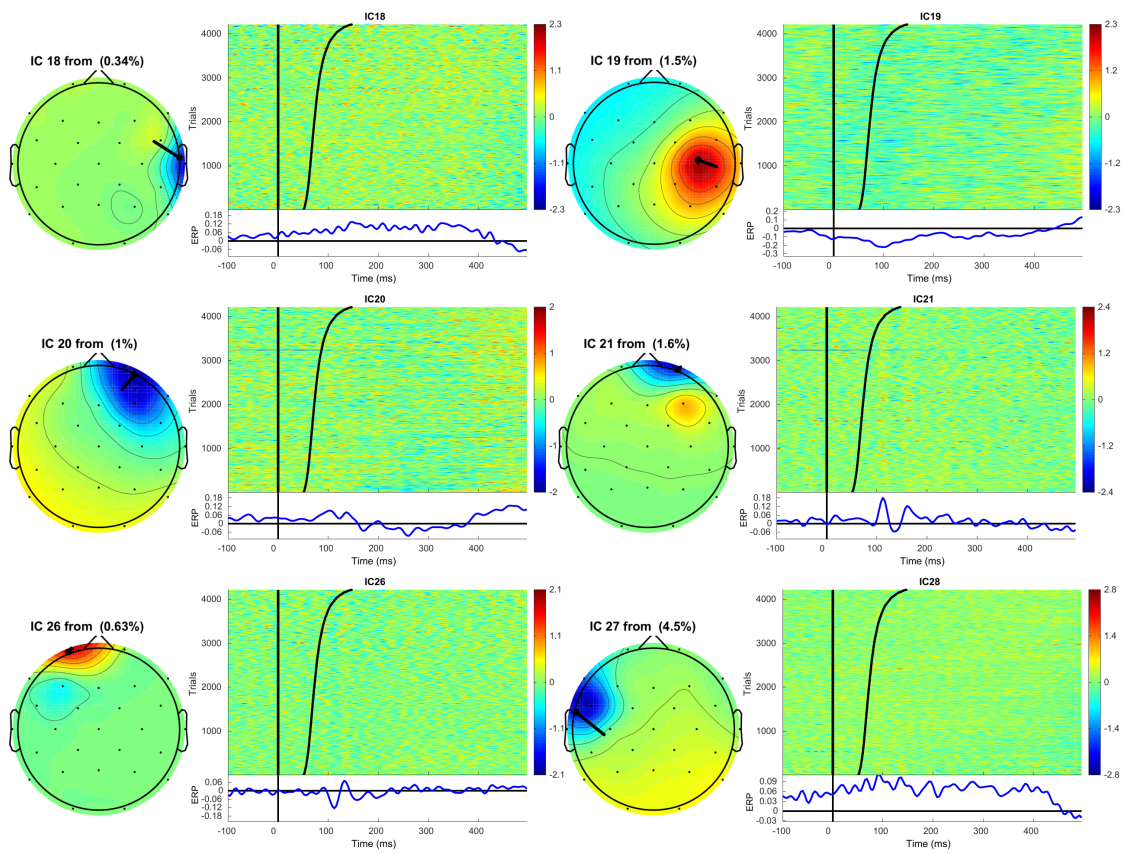

Figure S2: List of excluded components in range IC18-27. Note some components have multiple dipoles (e.g., ICs 21, 26)

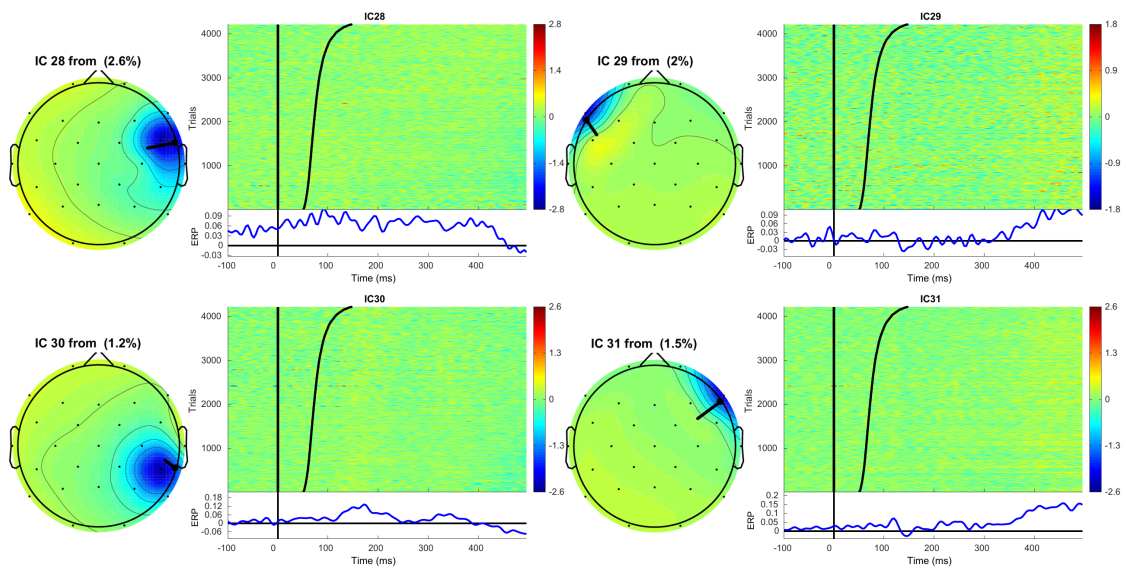

Figure S3: List of excluded components in range IC28-31. Note absence of consistent synchronized activity across trials.

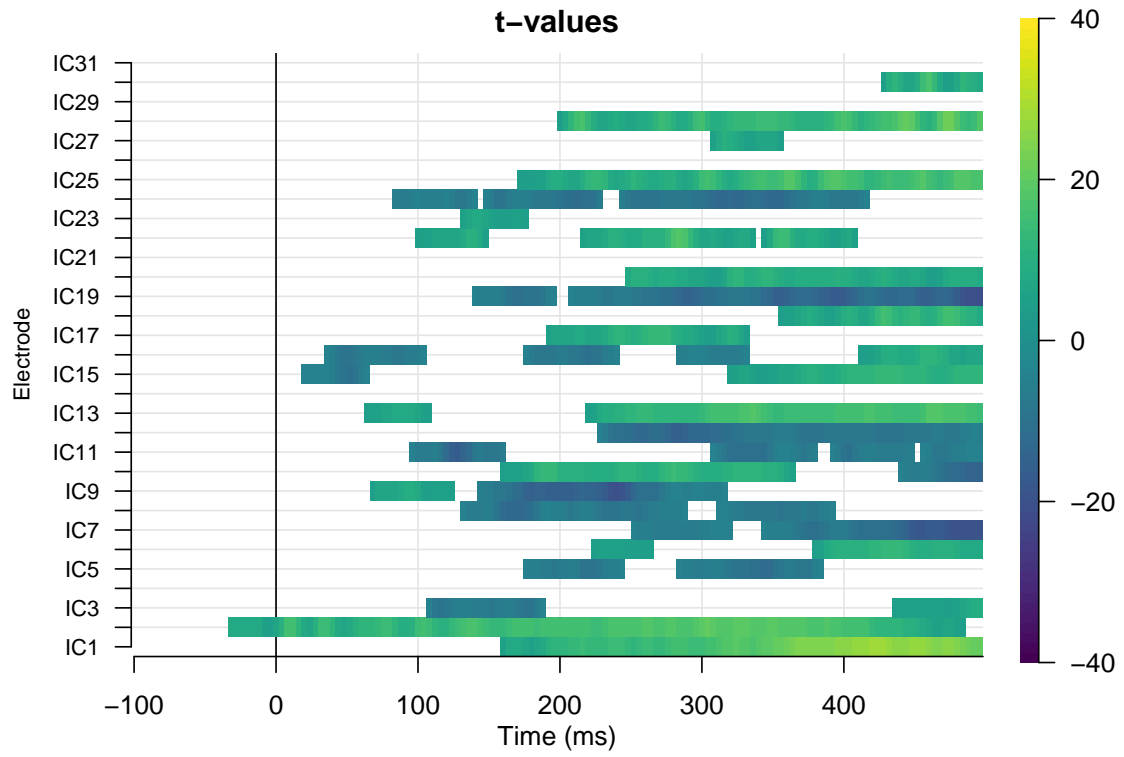

Figure S4: Overview of correlation between amplitudes and naming latencies for all obtained components.

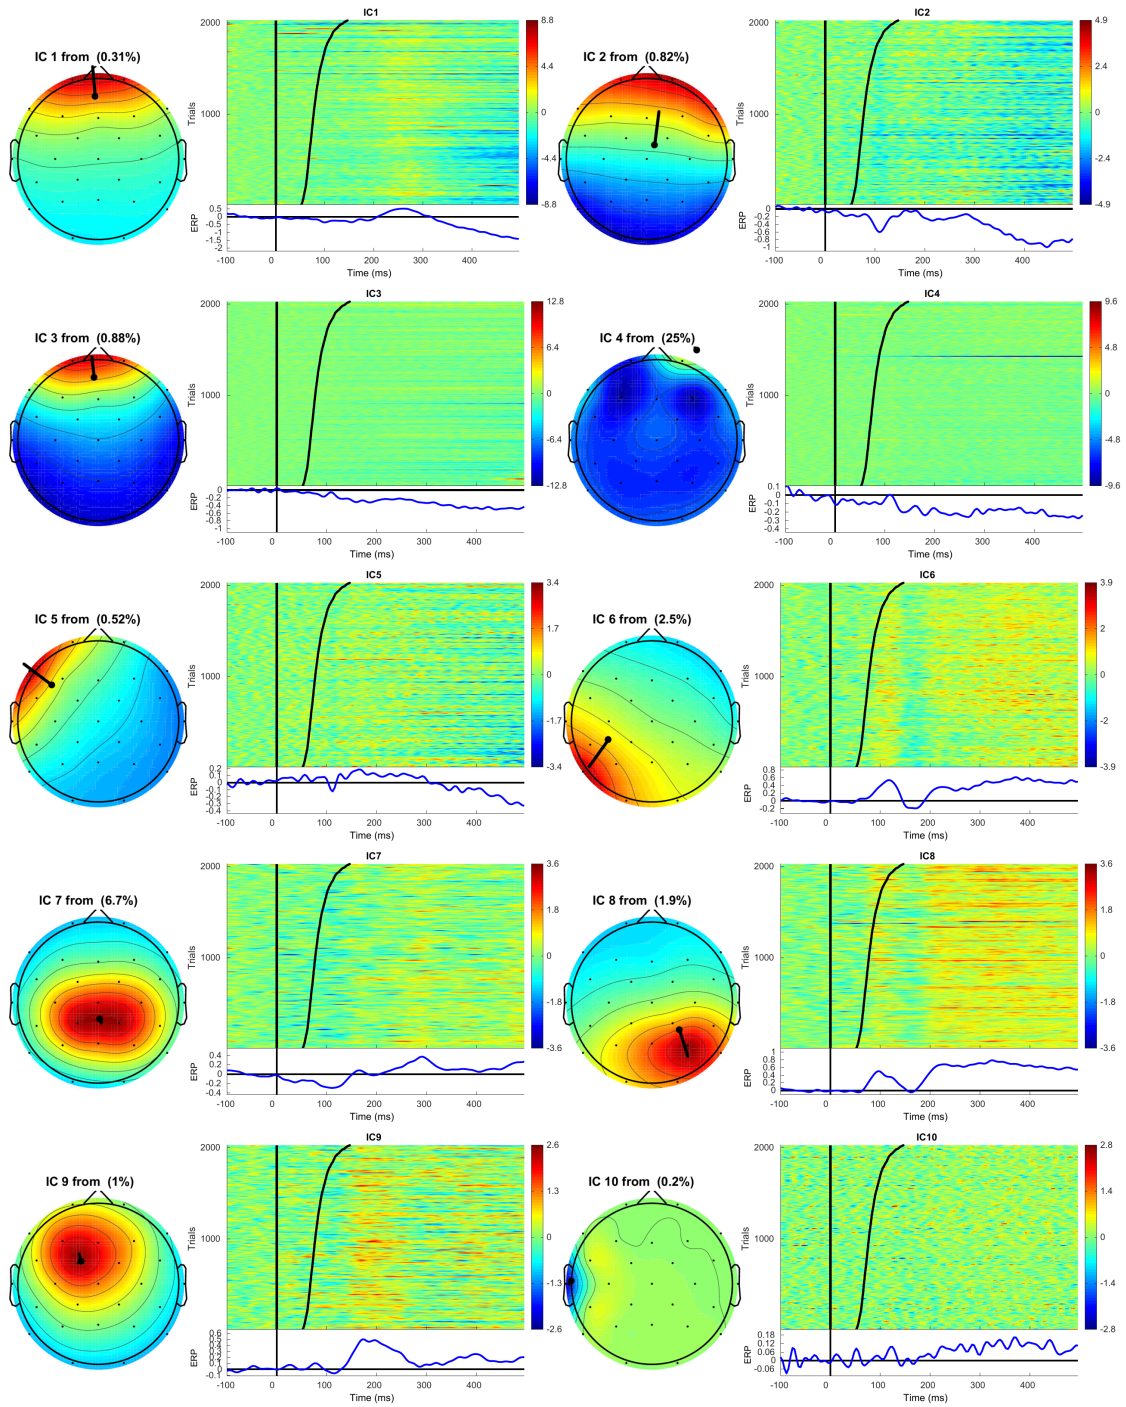

Figure S5: List of ICs 1-10 using only data from before familiarization.

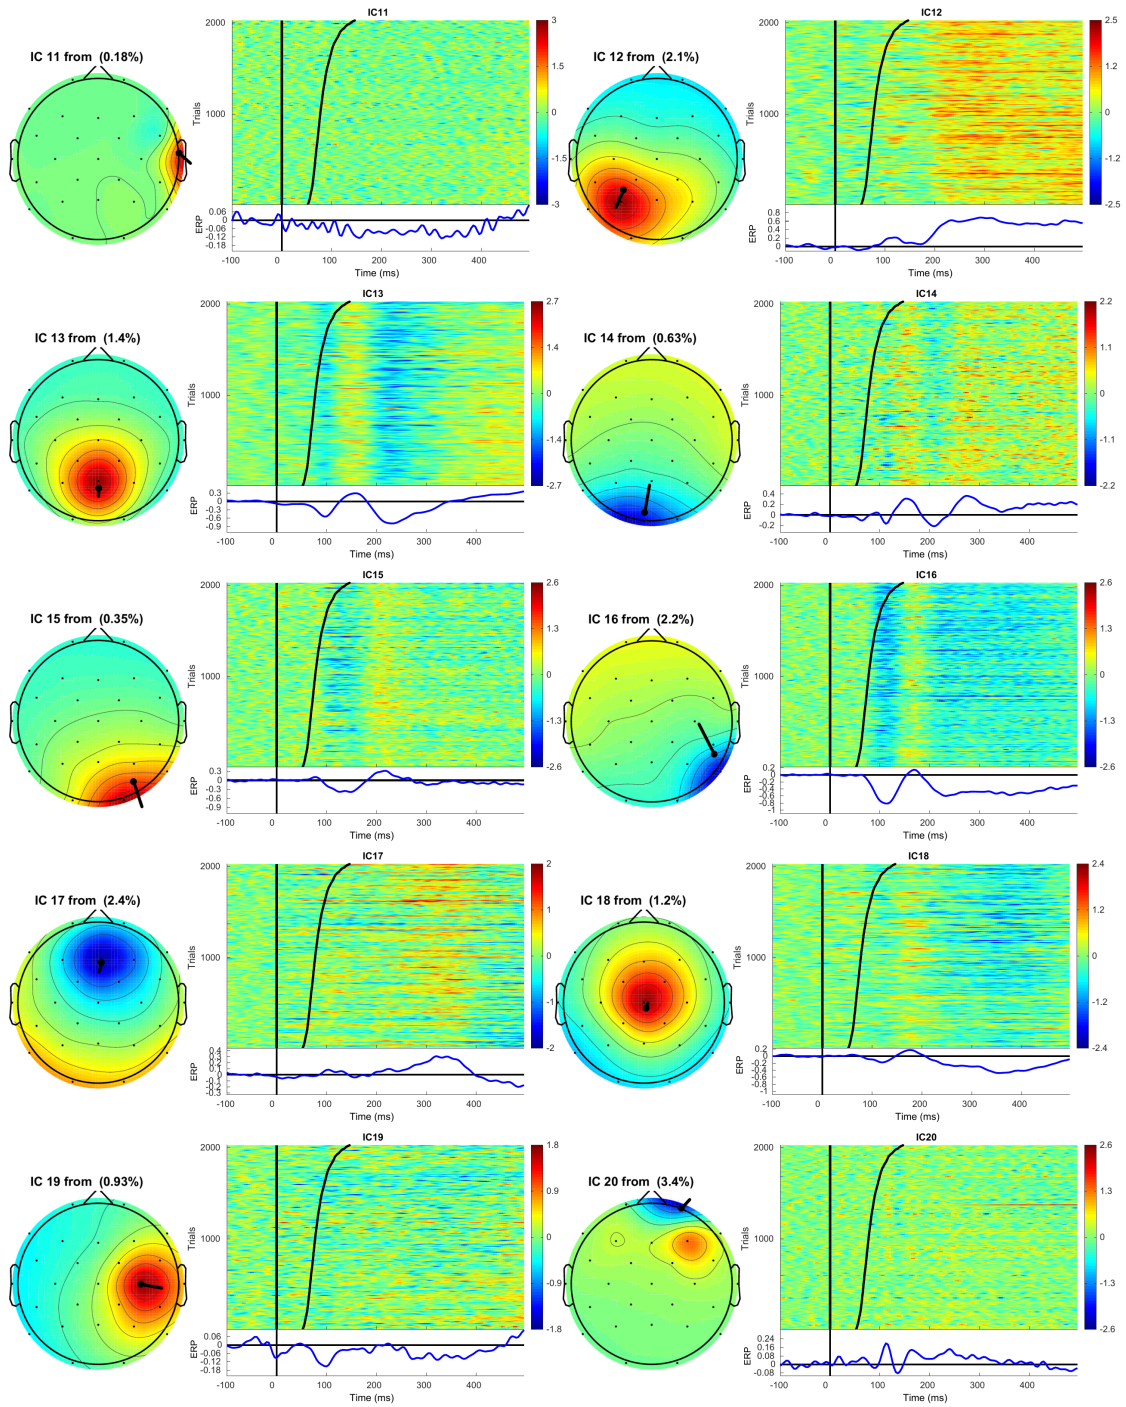

Figure S6: List of ICs 11-20 using only data from before familiarization.

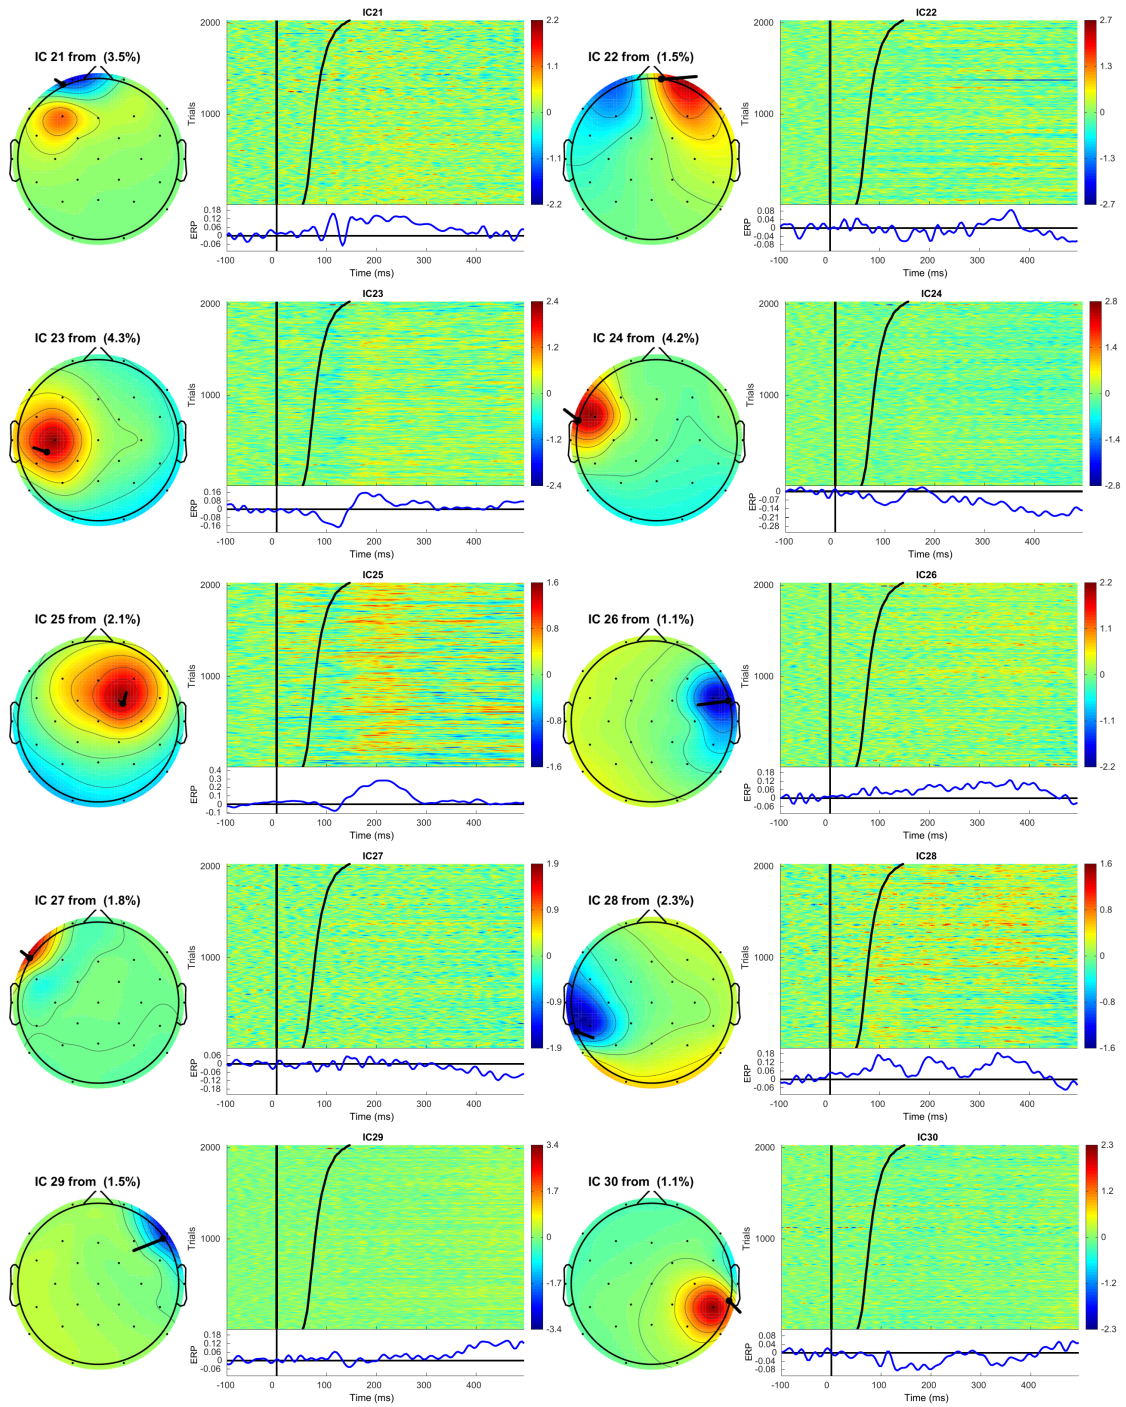

Figure S7: List of ICs 21-30 using only data from before familiarization.



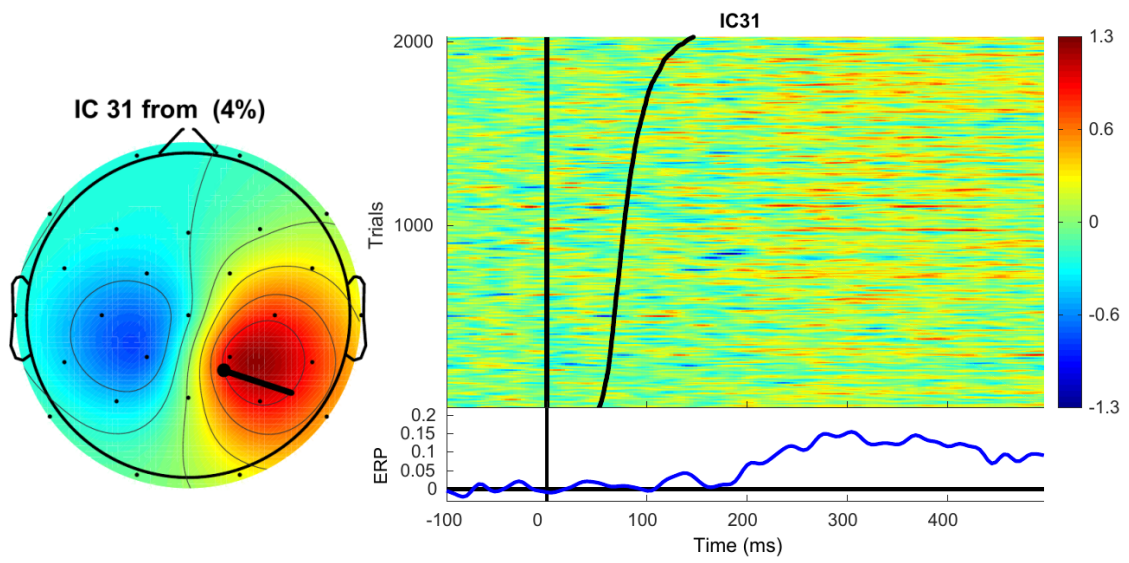

Figure S8: List of IC31 using only data from before familiarization.

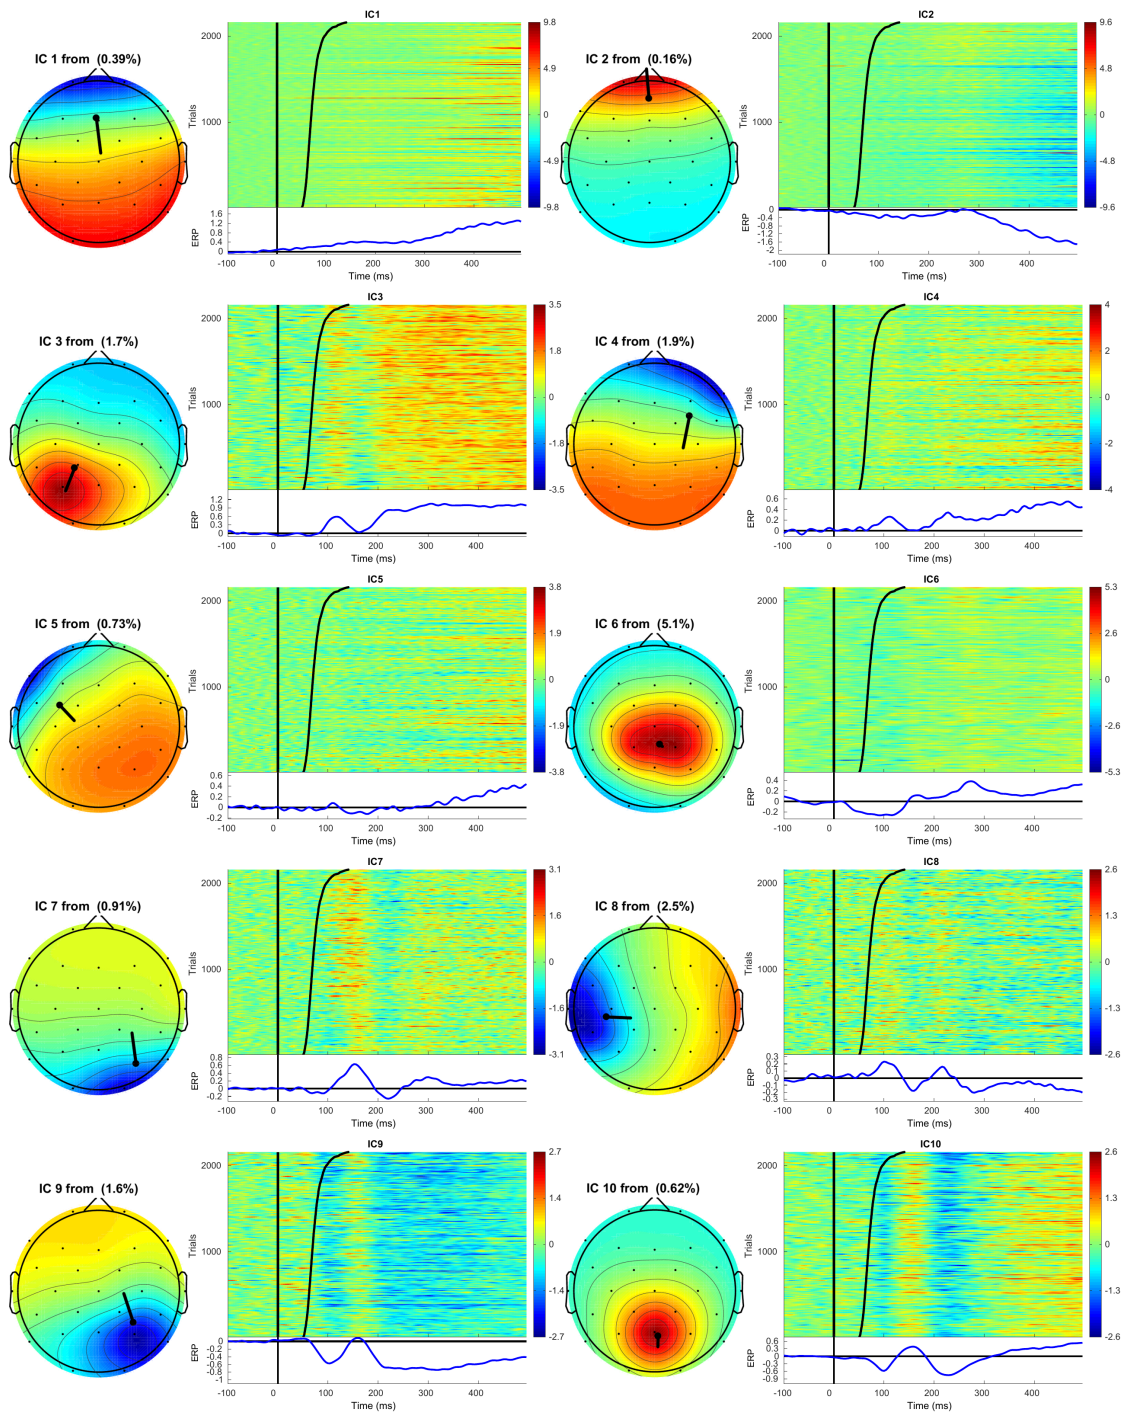

Figure S9: List of ICs 1-10 using only data from after familiarization.

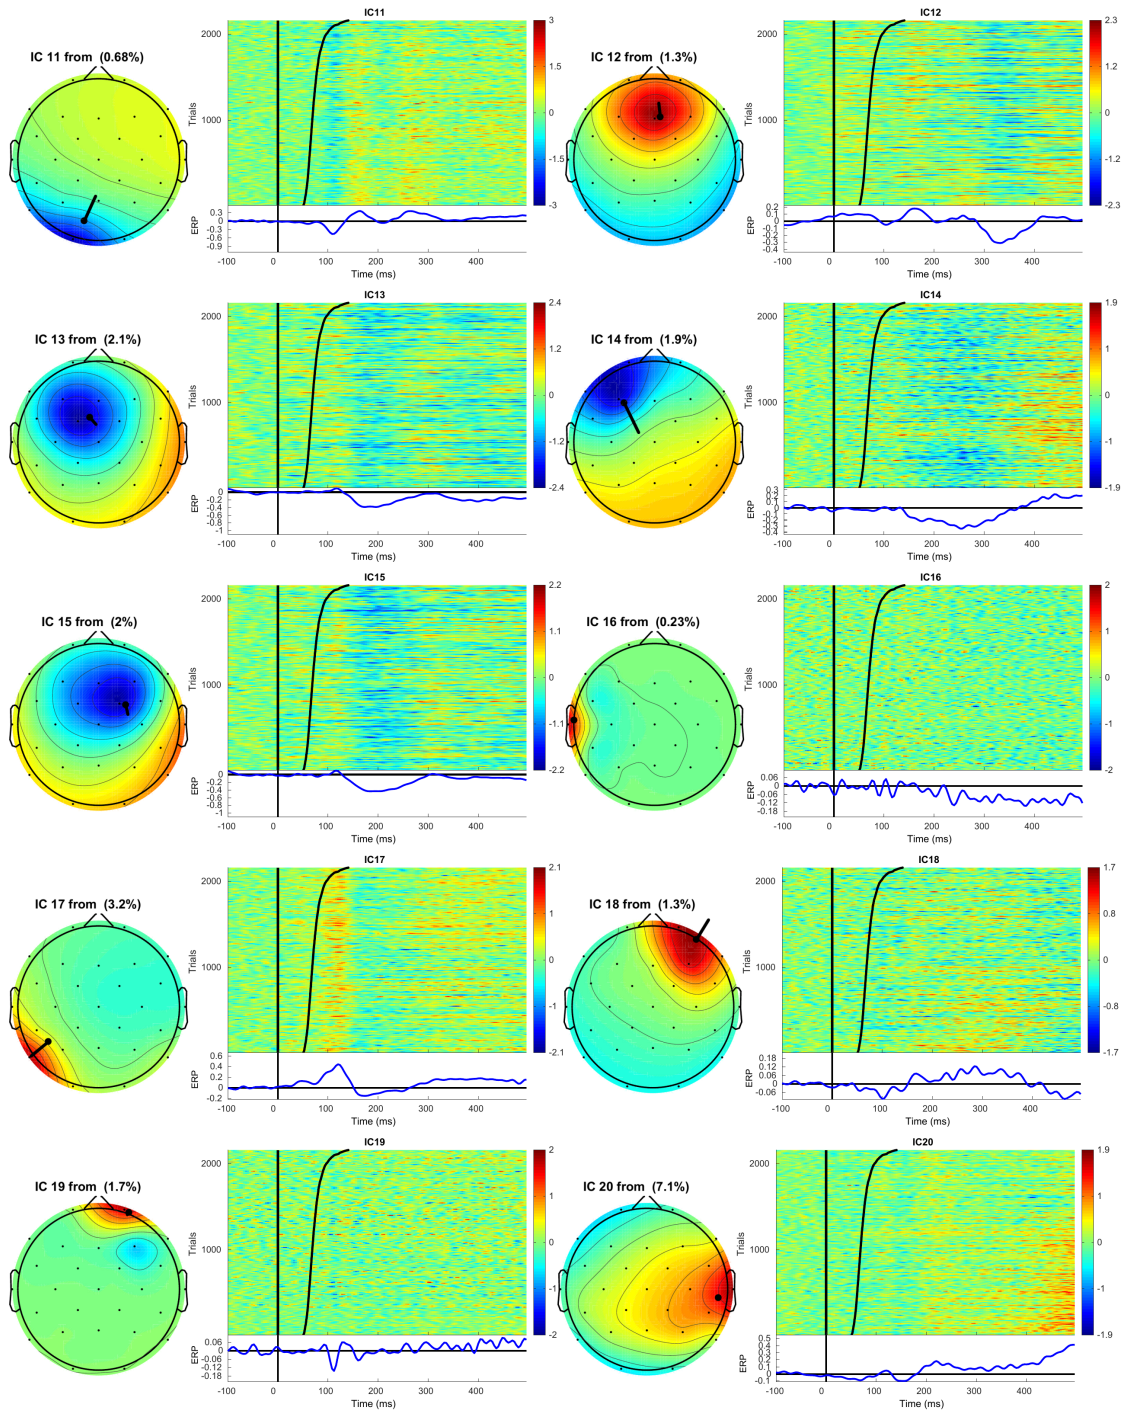

Figure S10: List of ICs 11-20 using only data from after familiarization.

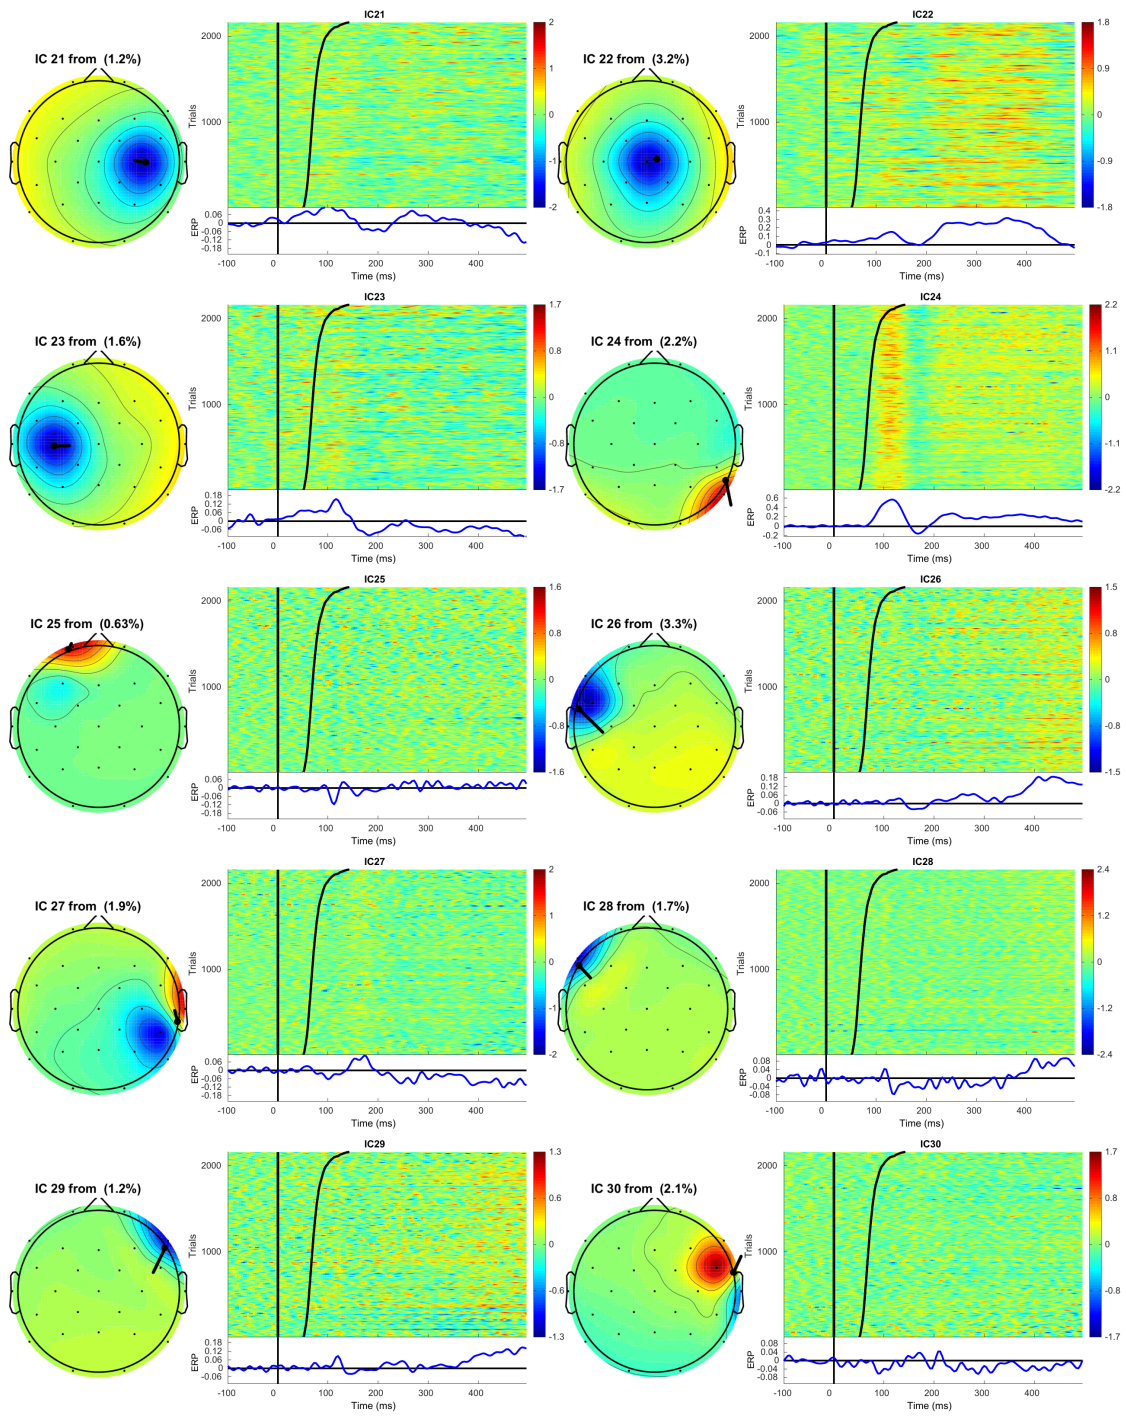

Figure S11: List of ICs 21-30 using only data from after familiarization.

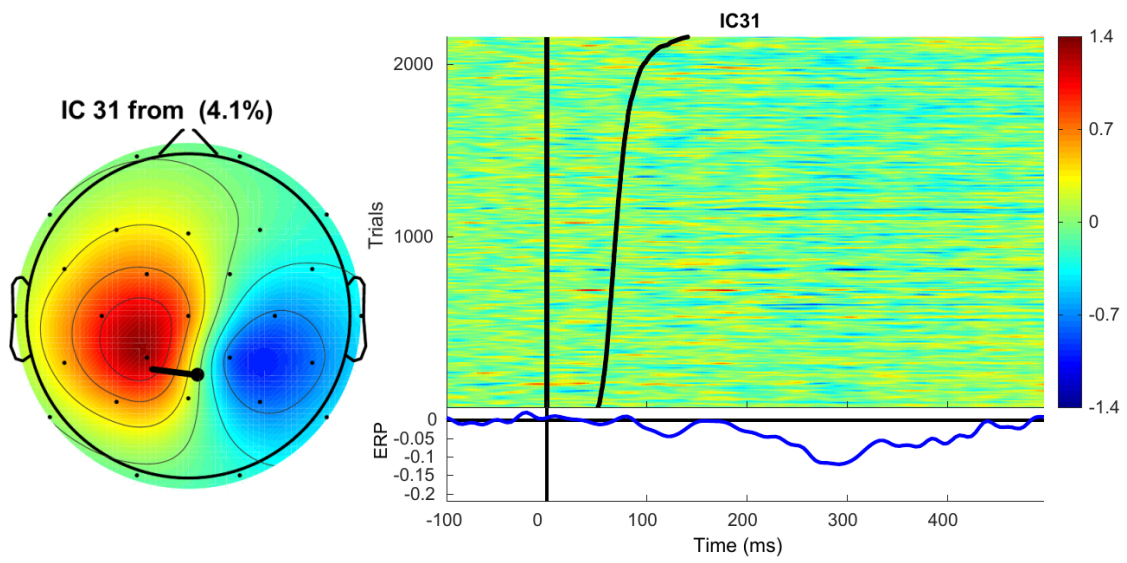

Figure S12: List of IC31 using only data from after familiarization.

Table S1: Ratios (top panel) and milliseconds (bottom panel) of group-level activity overlap between the time courses of for Independent Component from before familiarization.

|    | 6      | 9      | 13     | 14     | 15     | 16     | 17     | 18     | 25     |
|----|--------|--------|--------|--------|--------|--------|--------|--------|--------|
| 6  | 1.00   | 1.00   | 0.96   | 1.00   | 1.00   | 0.98   | 1.00   | 1.00   | 1.00   |
| 9  | 0.62   | 1.00   | 0.69   | 0.70   | 0.62   | 0.72   | 0.57   | 0.74   | 1.00   |
| 13 | 0.50   | 0.57   | 1.00   | 0.43   | 1.00   | 0.60   | 0.09   | 0.23   | 1.00   |
| 14 | 0.89   | 1.00   | 0.75   | 1.00   | 0.72   | 0.85   | 1.00   | 1.00   | 1.00   |
| 15 | 0.32   | 0.32   | 0.62   | 0.26   | 1.00   | 0.37   | 0.00   | 0.00   | 0.69   |
| 16 | 0.84   | 1.00   | 1.00   | 0.82   | 1.00   | 1.00   | 0.71   | 0.89   | 1.00   |
| 17 | 0.55   | 0.51   | 0.10   | 0.62   | 0.00   | 0.46   | 1.00   | 0.87   | 0.00   |
| 18 | 0.52   | 0.62   | 0.23   | 0.59   | 0.00   | 0.54   | 0.82   | 1.00   | 0.15   |
| 25 | 0.26   | 0.41   | 0.50   | 0.29   | 0.56   | 0.30   | 0.00   | 0.08   | 1.00   |
| 6  | 400.00 |        |        |        |        |        |        |        |        |
| 9  | 248.00 | 248.00 |        |        |        |        |        |        |        |
| 13 | 196.00 | 140.00 | 204.00 |        |        |        |        |        |        |
| 14 | 356.00 | 248.00 | 152.00 | 356.00 |        |        |        |        |        |
| 15 | 124.00 | 76.00  | 124.00 | 88.00  | 124.00 |        |        |        |        |
| 16 | 336.00 | 248.00 | 204.00 | 292.00 | 124.00 | 344.00 |        |        |        |
| 17 | 220.00 | 124.00 | 16.00  | 220.00 | 0.00   | 156.00 | 220.00 |        |        |
| 18 | 208.00 | 152.00 | 44.00  | 208.00 | 0.00   | 184.00 | 180.00 | 208.00 |        |
| 25 | 100.00 | 100.00 | 100.00 | 100.00 | 68.00  | 100.00 | 0.00   | 12.00  | 100.00 |

Table S2: Ratios (top panel) and milliseconds (bottom panel) of group-level activity overlap between the time courses of for Independent Components from after familiarization.

|    | 7      | 8      | 9      | 10     | 11     | 12     | 13     | 14     | 15     | 17     | 22     | 24     |
|----|--------|--------|--------|--------|--------|--------|--------|--------|--------|--------|--------|--------|
| 7  | 1.00   | 1.00   | 1.00   | 0.94   | 0.85   | 1.00   | 1.00   | 1.00   | 1.00   | 1.00   | 0.94   | 1.00   |
| 8  | 0.98   | 1.00   | 1.00   | 0.92   | 0.84   | 1.00   | 1.00   | 1.00   | 1.00   | 1.00   | 0.92   | 1.00   |
| 9  | 0.60   | 0.61   | 1.00   | 0.56   | 0.51   | 0.68   | 0.69   | 0.70   | 0.62   | 0.57   | 0.56   | 0.62   |
| 10 | 1.00   | 1.00   | 1.00   | 1.00   | 0.91   | 1.00   | 1.00   | 1.00   | 1.00   | 1.00   | 1.00   | 1.00   |
| 11 | 1.00   | 1.00   | 1.00   | 1.00   | 1.00   | 1.00   | 1.00   | 1.00   | 1.00   | 1.00   | 1.00   | 1.00   |
| 12 | 0.70   | 0.72   | 0.79   | 0.66   | 0.60   | 1.00   | 0.44   | 0.82   | 0.22   | 1.00   | 0.66   | 0.73   |
| 13 | 0.50   | 0.50   | 0.57   | 0.46   | 0.42   | 0.31   | 1.00   | 0.43   | 1.00   | 0.09   | 0.46   | 0.50   |
| 14 | 0.86   | 0.87   | 1.00   | 0.80   | 0.73   | 1.00   | 0.75   | 1.00   | 0.72   | 1.00   | 0.80   | 0.88   |
| 15 | 0.30   | 0.31   | 0.32   | 0.29   | 0.26   | 0.09   | 0.62   | 0.26   | 1.00   | 0.00   | 0.29   | 0.31   |
| 17 | 0.53   | 0.54   | 0.51   | 0.50   | 0.46   | 0.76   | 0.10   | 0.62   | 0.00   | 1.00   | 0.50   | 0.55   |
| 22 | 1.00   | 1.00   | 1.00   | 1.00   | 0.91   | 1.00   | 1.00   | 1.00   | 1.00   | 1.00   | 1.00   | 1.00   |
| 24 | 0.97   | 0.99   | 1.00   | 0.91   | 0.83   | 1.00   | 0.98   | 1.00   | 1.00   | 1.00   | 0.91   | 1.00   |
| 7  | 416.00 |        |        |        |        |        |        |        |        |        |        |        |
| 8  | 408.00 | 408.00 |        |        |        |        |        |        |        |        |        |        |
| 9  | 248.00 | 248.00 | 248.00 |        |        |        |        |        |        |        |        |        |
| 10 | 416.00 | 408.00 | 248.00 | 444.00 |        |        |        |        |        |        |        |        |
| 11 | 416.00 | 408.00 | 248.00 | 444.00 | 488.00 |        |        |        |        |        |        |        |
| 12 | 292.00 | 292.00 | 196.00 | 292.00 | 292.00 | 292.00 |        |        |        |        |        |        |
| 13 | 204.00 | 204.00 | 140.00 | 204.00 | 204.00 | 88.00  | 204.00 |        |        |        |        |        |
| 14 | 356.00 | 356.00 | 248.00 | 356.00 | 356.00 | 292.00 | 152.00 | 356.00 |        |        |        |        |
| 15 | 124.00 | 124.00 | 76.00  | 124.00 | 124.00 | 24.00  | 124.00 | 88.00  | 124.00 |        |        |        |
| 17 | 220.00 | 220.00 | 124.00 | 220.00 | 220.00 | 220.00 | 16.00  | 220.00 | 0.00   | 220.00 |        |        |
| 22 | 416.00 | 408.00 | 248.00 | 444.00 | 444.00 | 292.00 | 204.00 | 356.00 | 124.00 | 220.00 | 444.00 |        |
| 24 | 404.00 | 404.00 | 248.00 | 404.00 | 404.00 | 292.00 | 200.00 | 356.00 | 124.00 | 220.00 | 404.00 | 404.00 |
